# Supplementary material for: GPR39 marks specific cells within the sebaceous gland and contributes to skin wound healing
Source: PubMed Central journal article supplement — Sci Rep. 2015 Jan 21;5:7913. doi: 10.1038/srep07913 (PMC4300488; doi:10.1038/srep07913), 2015-01-21
Supplement: srep07913-s1.pdf [file srep07913-s1.pdf]

**GPR39 marks specific cells within the sebaceous gland and contributes to skin**

**wound healing**

Huashan Zhao<sup>a,b</sup>, Jingqiao Qiao<sup>c</sup>, Shoubing Zhang<sup>d</sup>, Huishan Zhang<sup>a</sup>, Xiaohua Lei<sup>a</sup>,

Xinyue Wang<sup>a</sup>, Zhili Deng<sup>a,b</sup>, Lina Ning<sup>a</sup>, Yujing Cao<sup>a</sup>, Yong Guo<sup>c</sup>, Shuang Liu<sup>a,\*</sup> and Enkui

Duan<sup>a,\*</sup>

**Supplementary information list**

Table S1

Figure S1

Figure S2

Figure legends for Figure S1 and S2

**Table S1. Primers used for RT-PCR**

| <b>Gene</b>   | <b>Sequence (5'-3')</b>   |
|---------------|---------------------------|
| <i>Gpr39</i>  | ACCACACCCAGCTATGCTCT      |
|               | TGAAGGGATGACAAATGGCAAT    |
| <i>Krt14</i>  | AGCGGCAAGAGTGAGATTTCT     |
|               | CCTCCAGGTTATTCTCCAGGG     |
| <i>Ivl</i>    | ATGTCCCATCAACACACACTG     |
|               | TGGAGTTGGTTGCTTTGCTTG     |
| <i>Krt1</i>   | ATGACCAAAGTTGAGCTTCAGG    |
|               | CAGATCCAAACTGCGGTTGTT     |
| <i>Lgr6</i>   | TCAAAGGCACCACTAGCCTG      |
|               | GAGACAGCTCCAGGATTCGG      |
| <i>Sox9</i>   | CTGAAGGGCTACGACTGGAC      |
|               | TACTGGTCTGCCAGCTTCCT      |
| <i>Lgr5</i>   | CCTACTCGAAGACTTACCCAGT    |
|               | GCATTGGGGTGAATGATAGCA     |
| <i>Blimp1</i> | GCAATCTCAAGACCCACCTTC     |
|               | CGAACCTCTCAATTTCTTCATT    |
| <i>Actb</i>   | TGGAATCCTGTGGCATCCATGAAAC |
|               | TAAAACGCAGCTCAGTAACAGTCCG |

*Krt14*

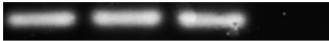

*Ivl*

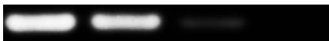

*Krt1*

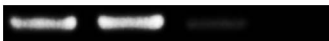

*Blimp1*

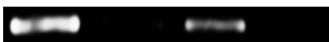

*Lgr6*

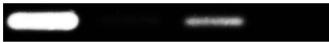

*Sox9*

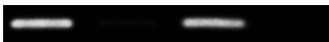

*Lgr5*

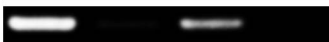

*Actb*

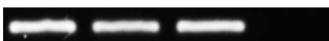

Epi                      IFE                      HF                      NEG

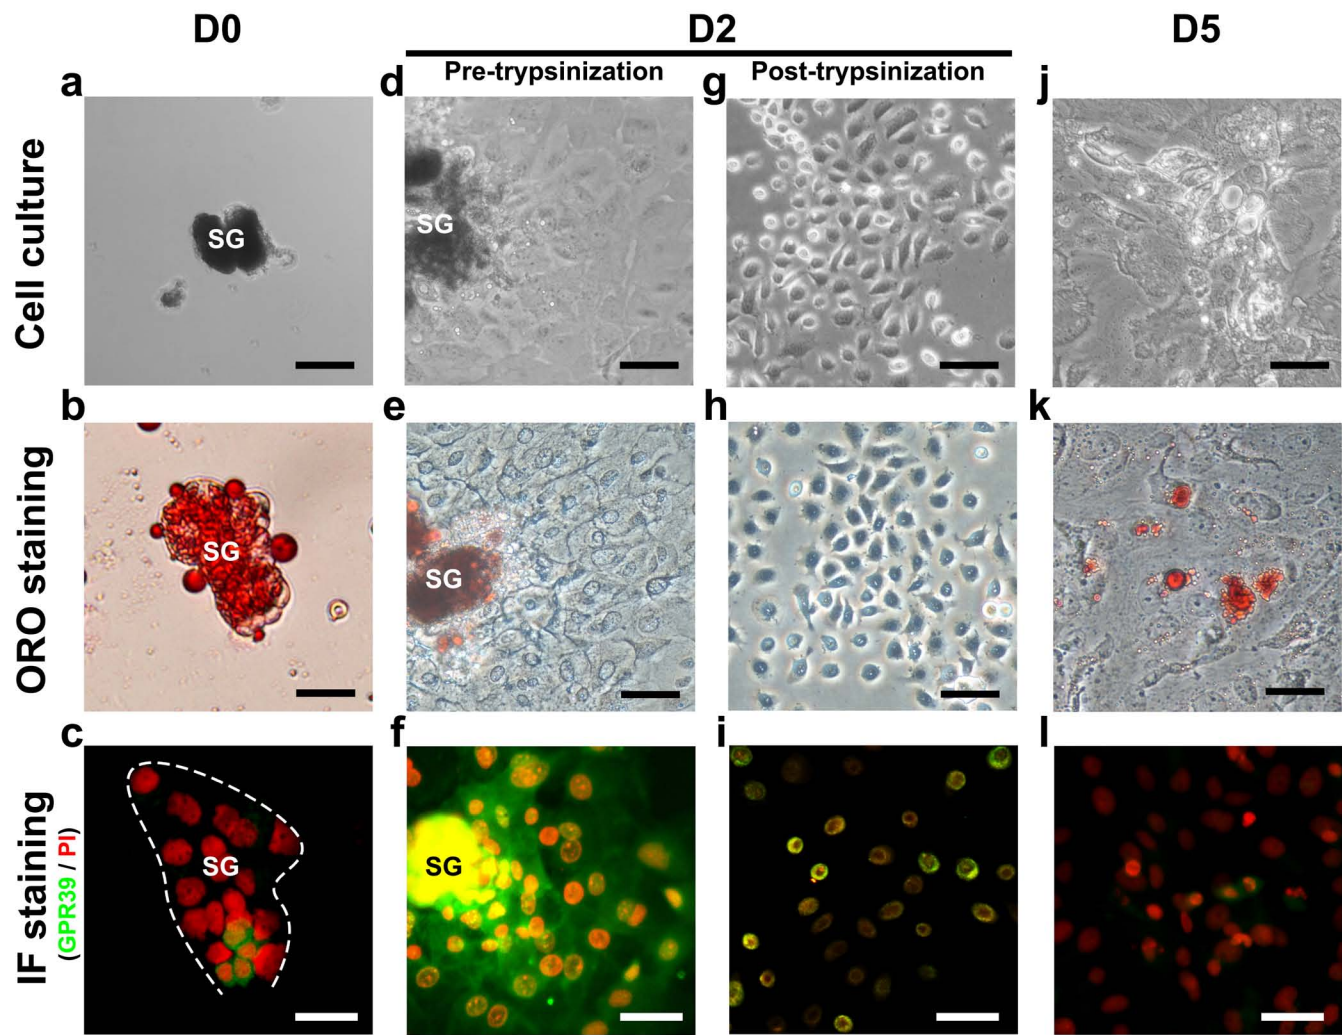

**Figure S1. Expression of IFE and HF markers in separate compartments of the epidermis**

**Figure S2. In vitro culture of whole SGs**

(a, d, g and j) Morphology of SGs or SG outgrowth on different days of culture. (b, e, h and k) ORO staining (red) of SGs or SG outgrowth on different days of culture. (c, f, i and l) GPR39 immunostaining (green) of SGs or SG outgrowth on different days of culture. PI was used for nuclear counterstaining. SG, sebaceous gland. Bar = 20  $\mu\text{m}$ .
